# Supplementary material
Source: ML conference proceedings conference paper supplement (https://openreview.net/forum?id=ejIzdt50ek)

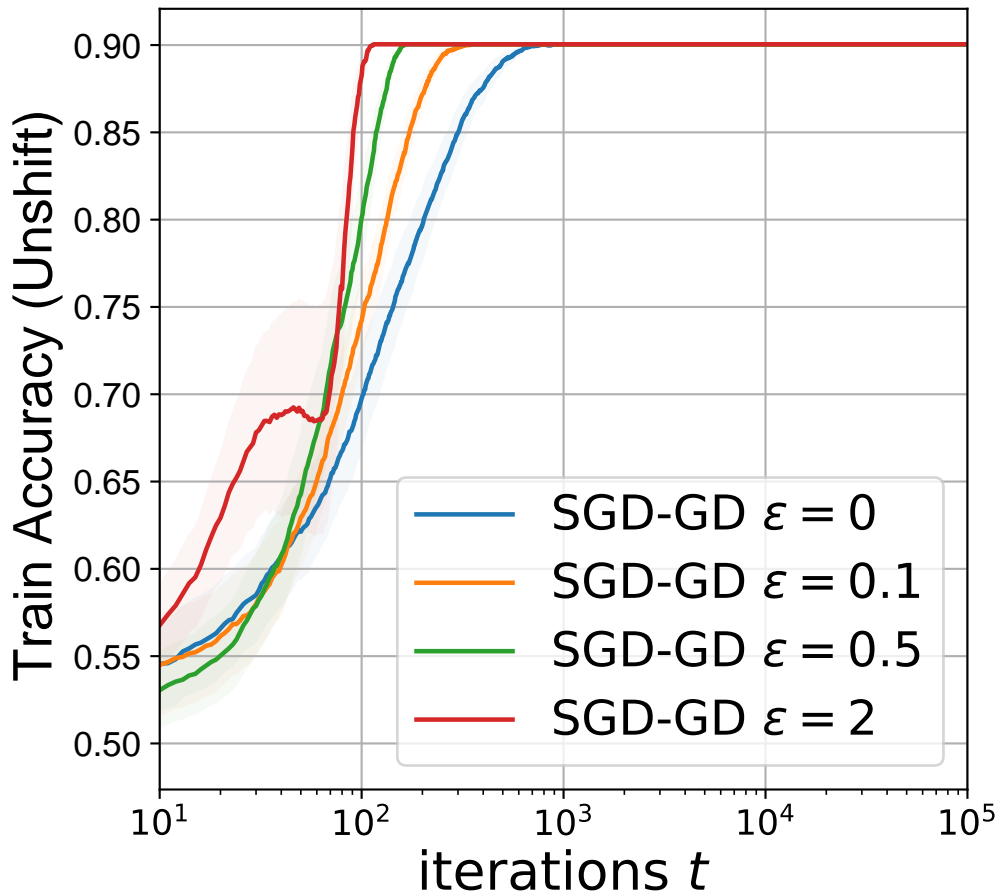

Supplement: supplementary_material [file attachment]

Test Accuracy

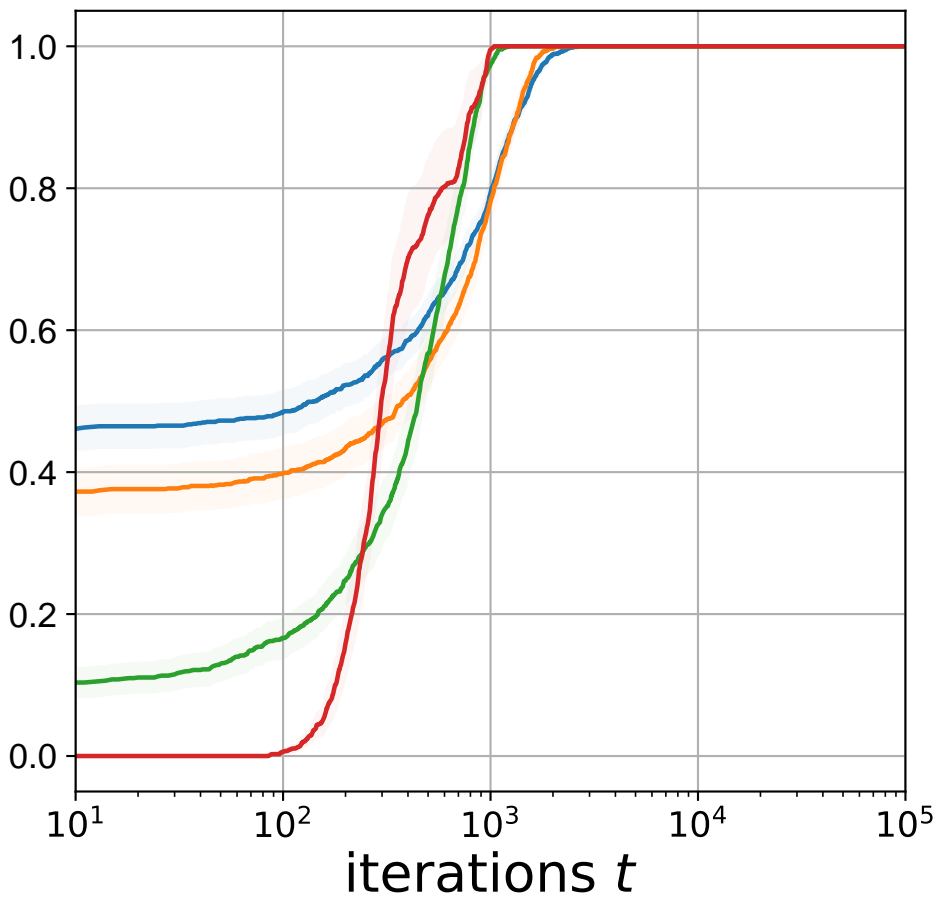

Supplement: supplementary_material [file attachment]

$\varepsilon = 10000$

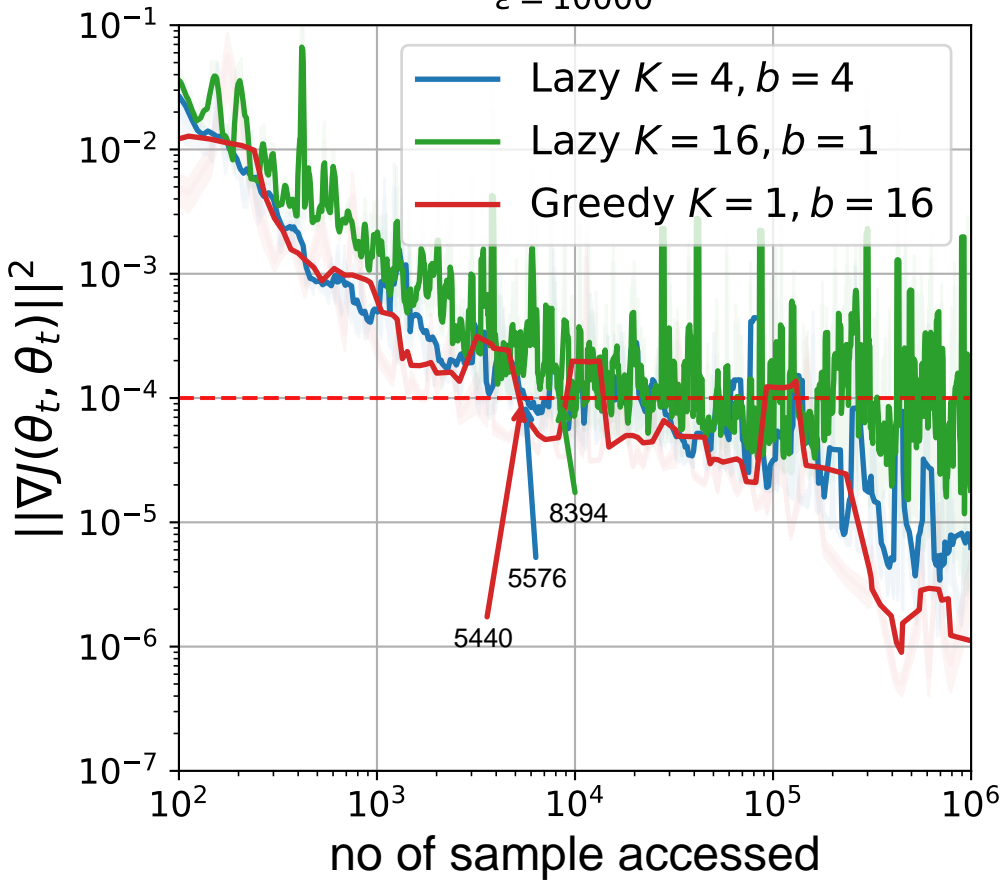

Supplement: supplementary_material [file attachment]

$\varepsilon = 10$

$\|\nabla J(\theta_t, \theta_t)\|^2$

- Lazy  $K = 4, b = 4$
- Lazy  $K = 16, b = 1$
- Greedy  $K = 1, b = 16$

1264

1856

3400

no of sample accessed

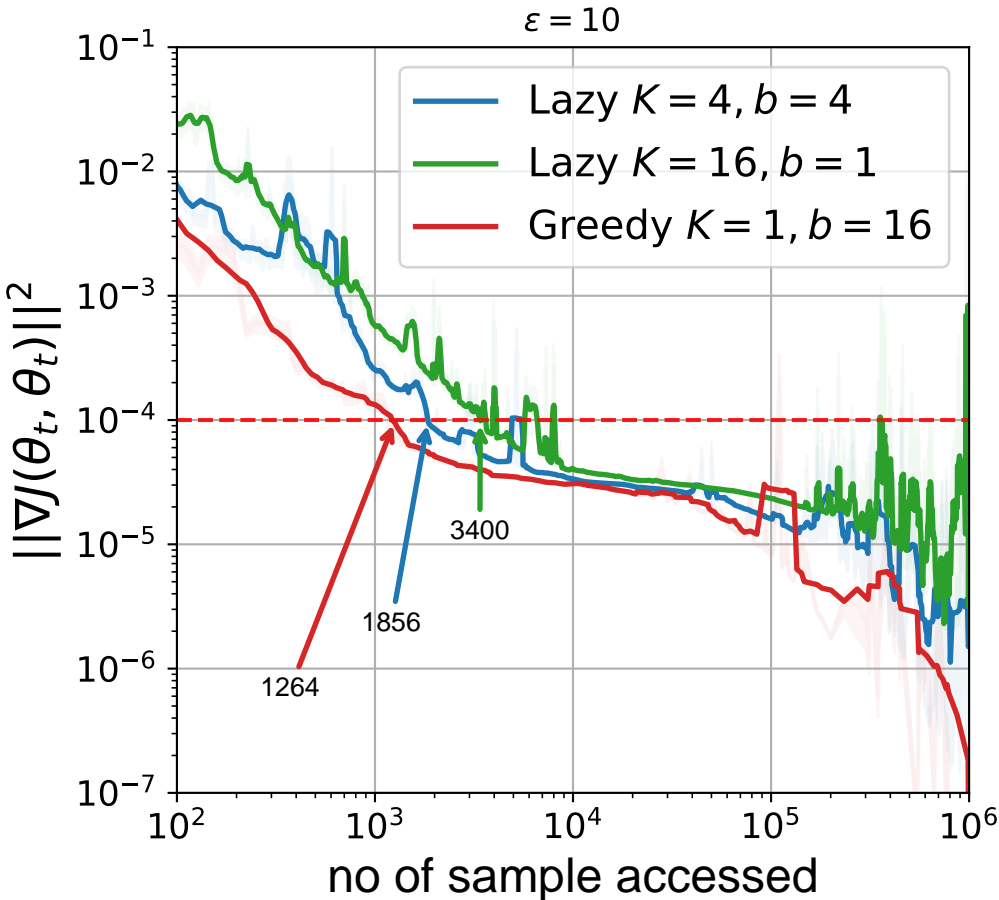

Supplement: supplementary_material [file attachment]

Train Accuracy

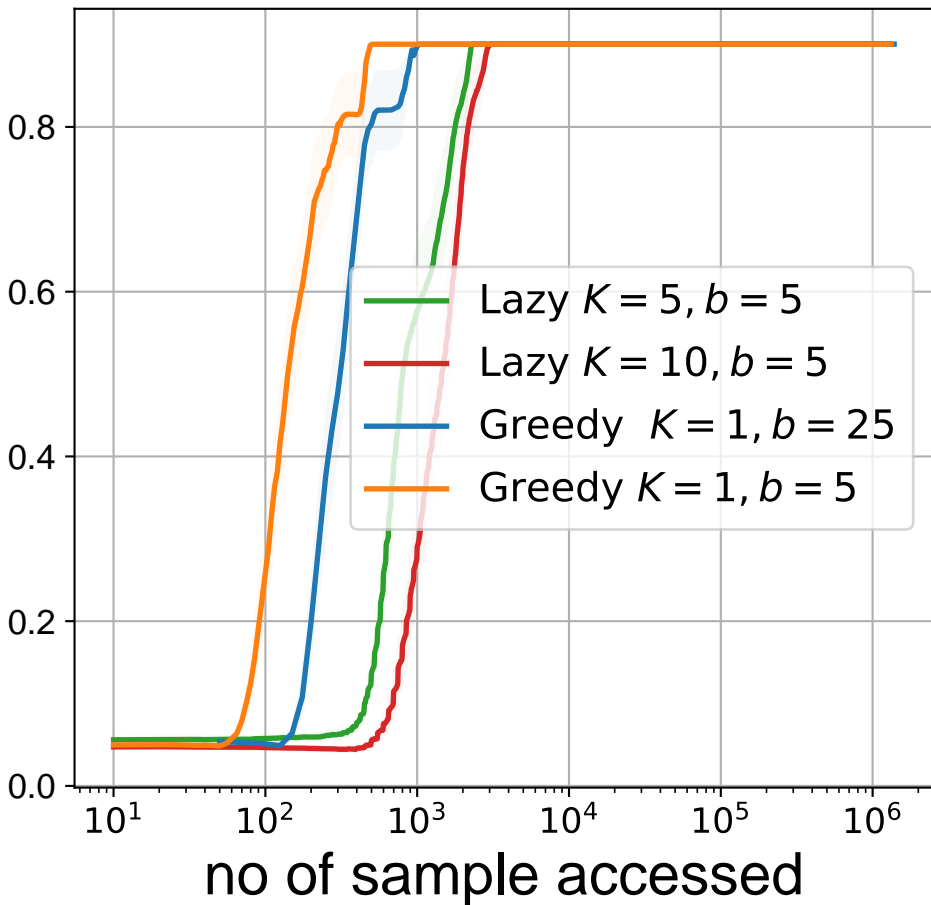

Supplement: supplementary_material [file attachment]

Test Accuracy

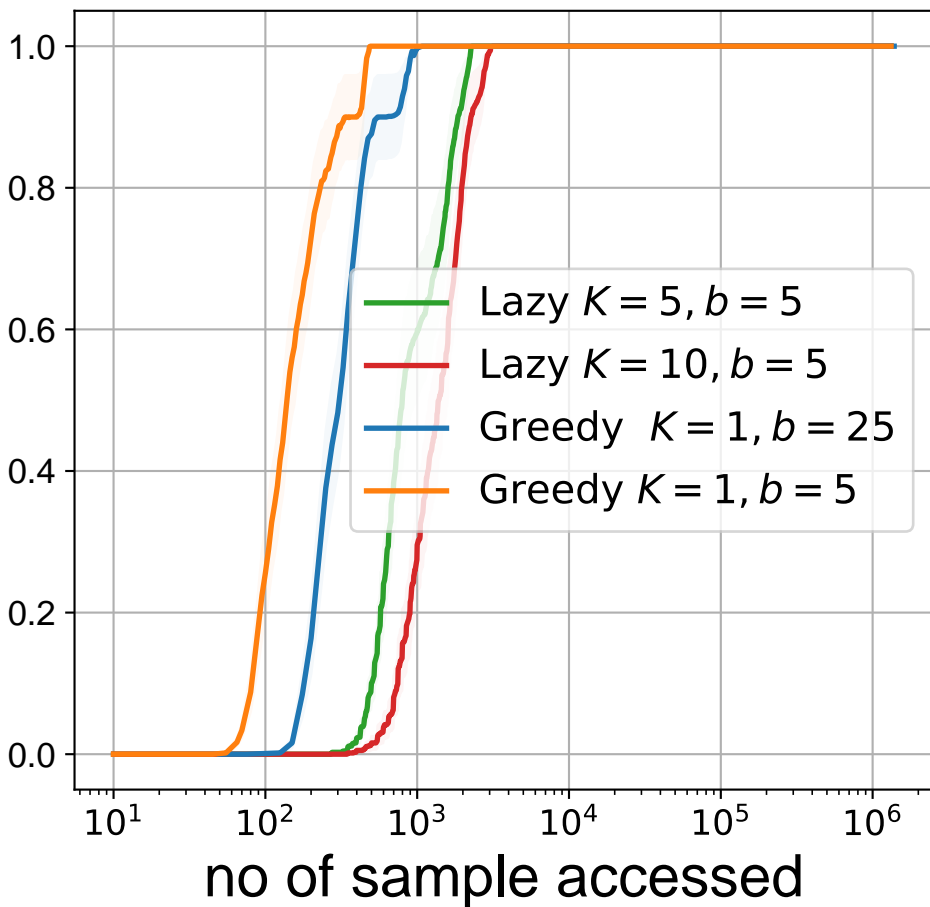

Supplement: supplementary_material [file attachment]

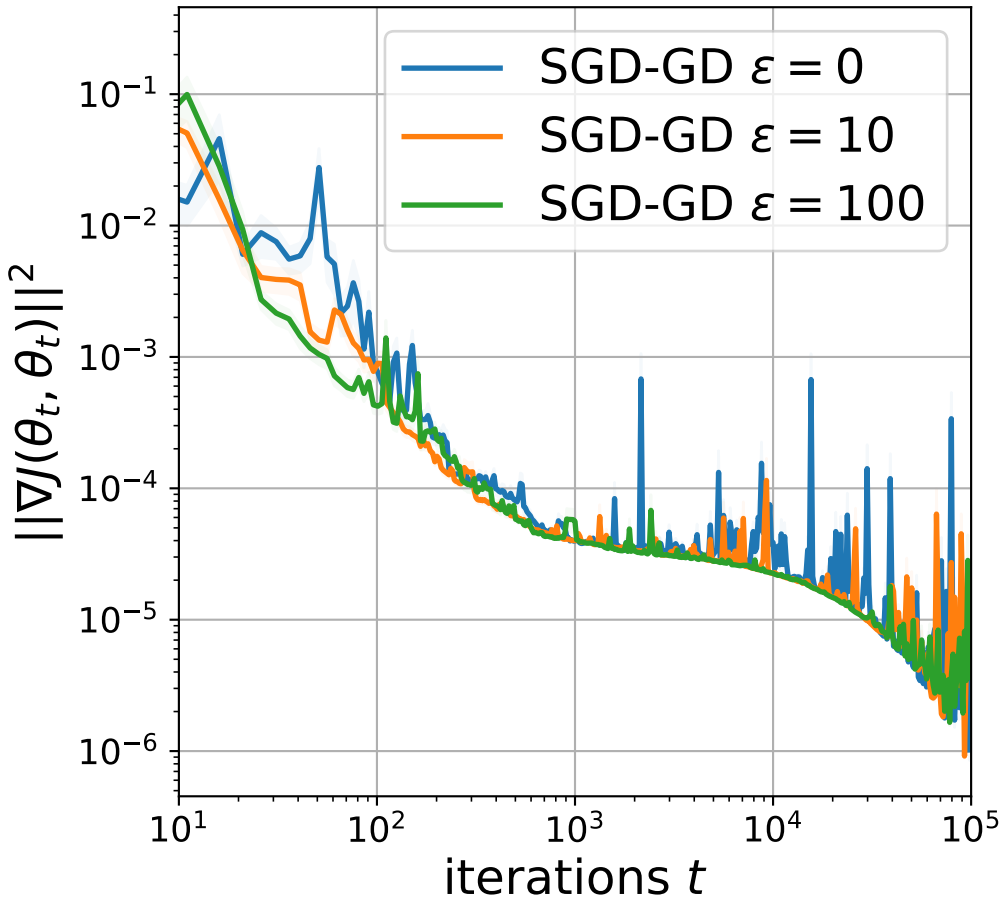

Supplement: supplementary_material [file attachment]

$\varepsilon = 10000$

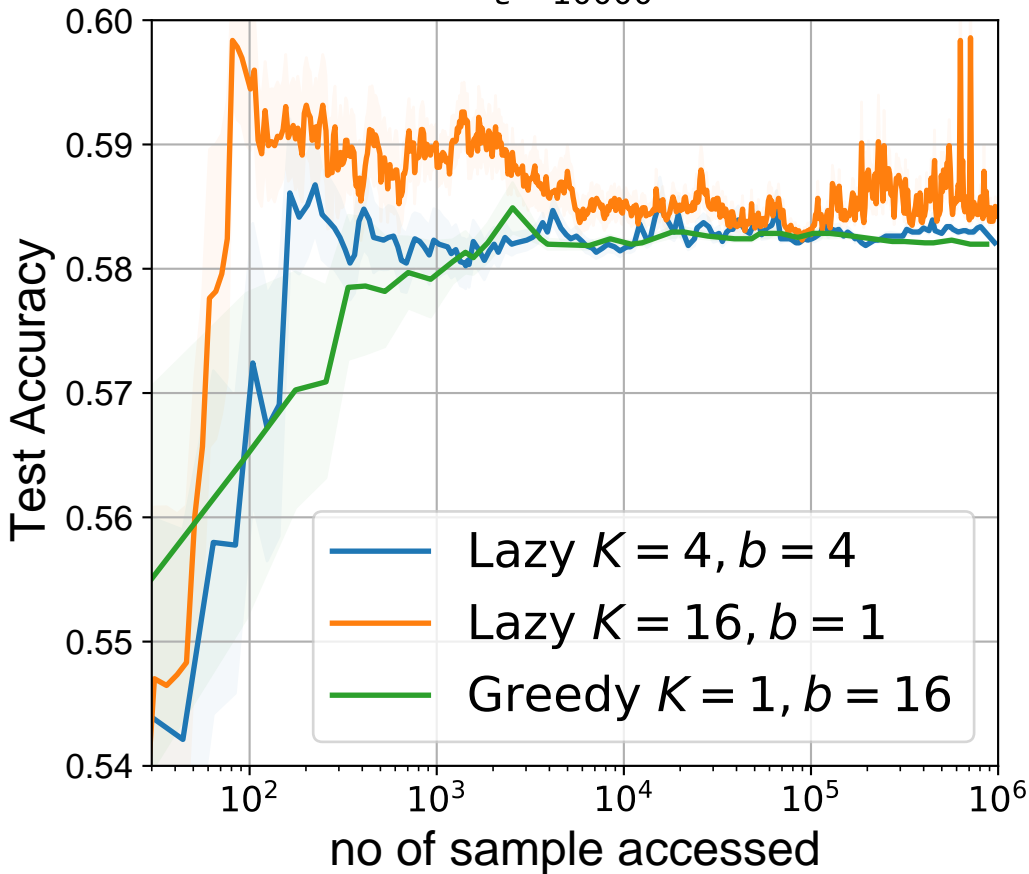

Supplement: supplementary_material [file attachment]

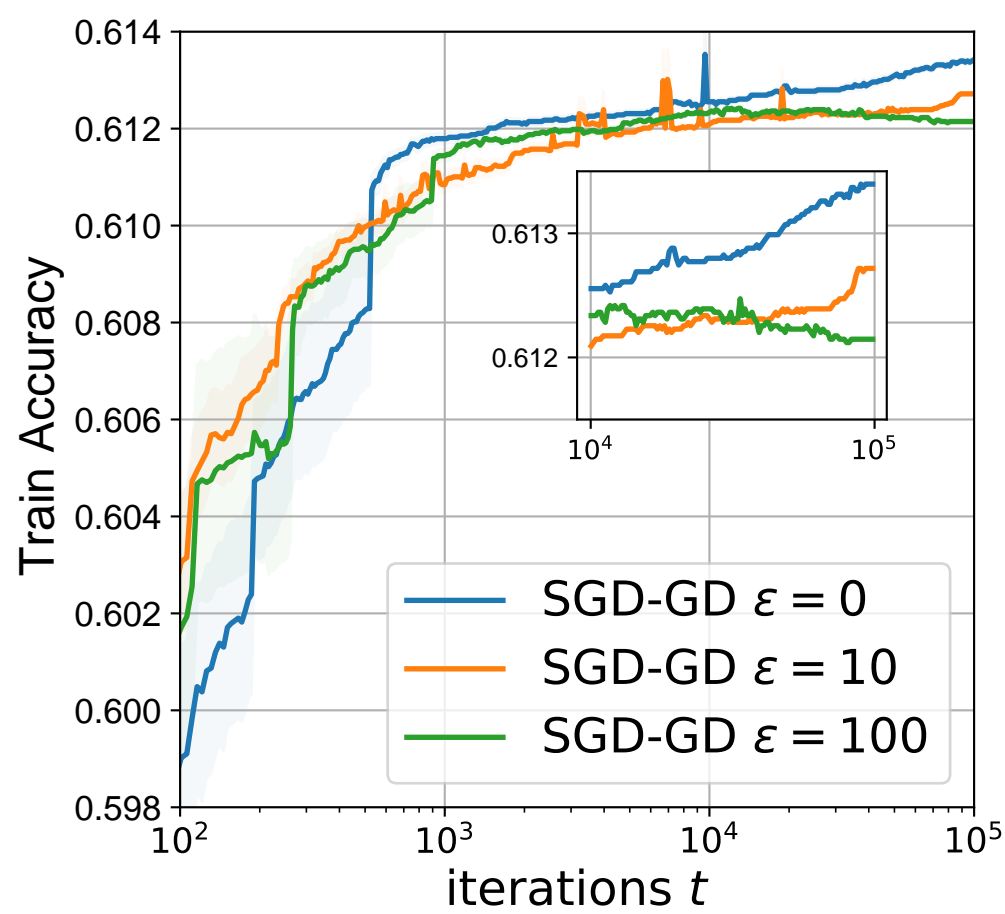

Supplement: supplementary_material [file attachment]

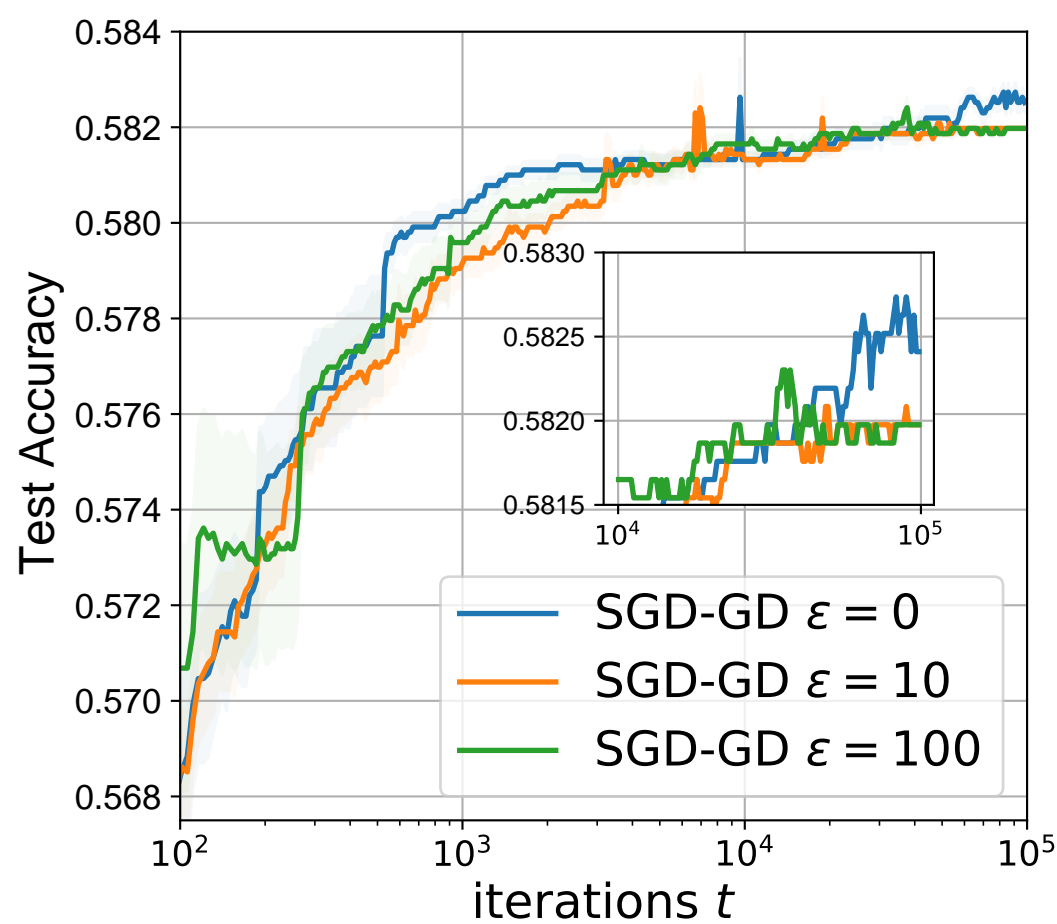

Supplement: supplementary_material [file attachment]

$\varepsilon = 10000$

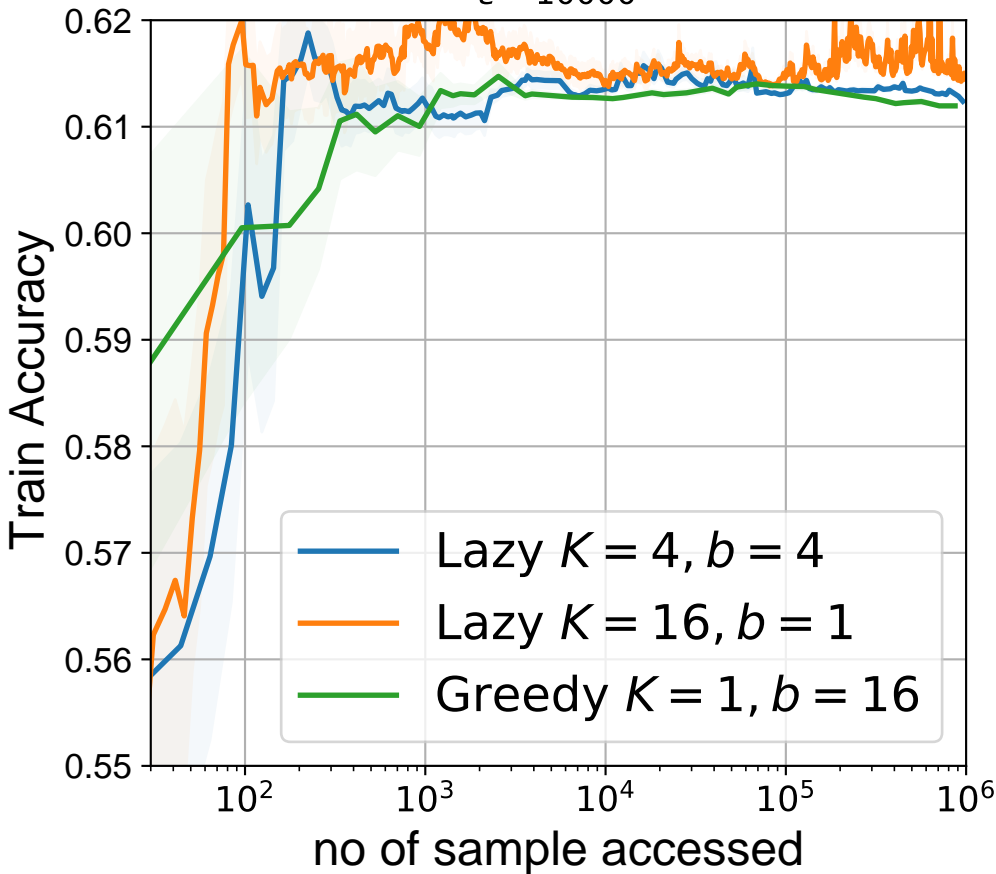

Supplement: supplementary_material [file attachment]

$\varepsilon = 10$

Train Accuracy

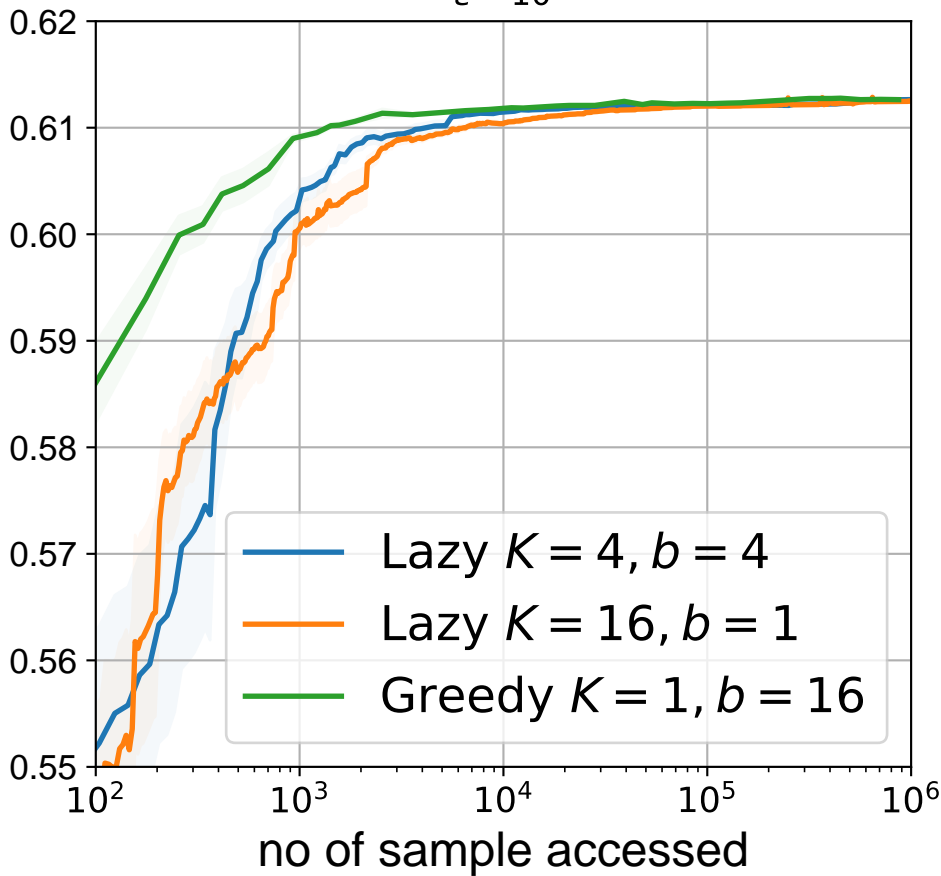

Supplement: supplementary_material [file attachment]

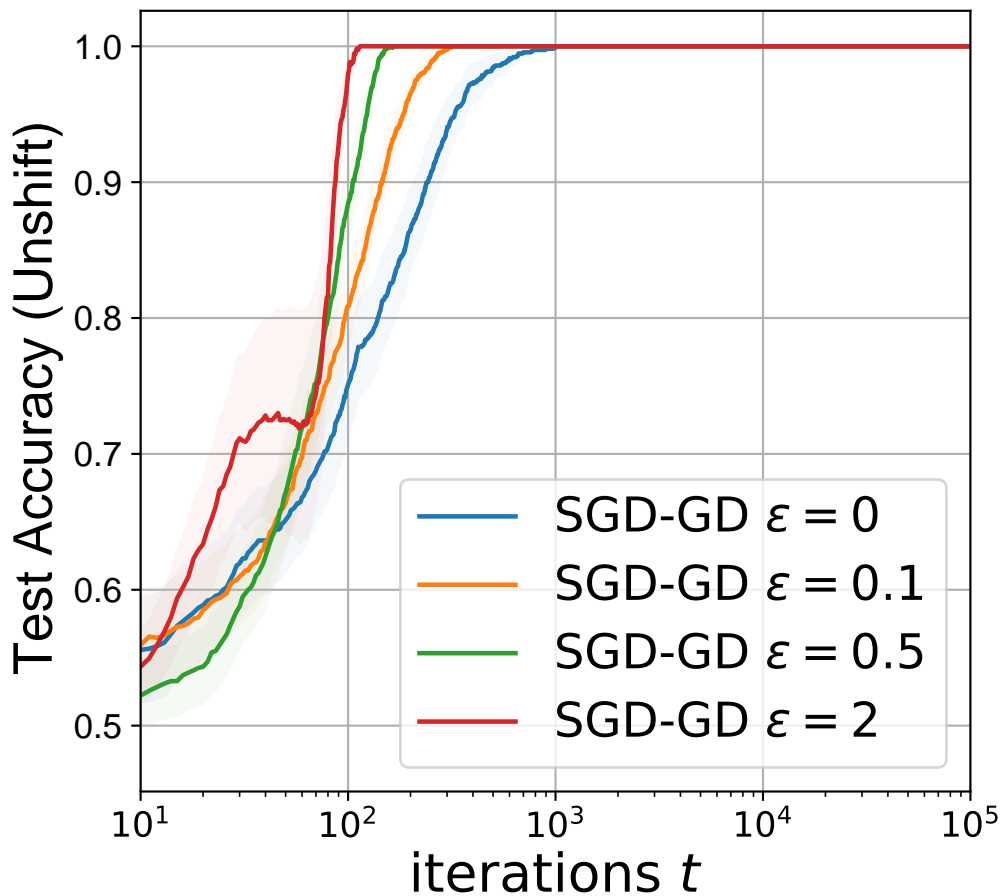

Supplement: supplementary_material [file attachment]

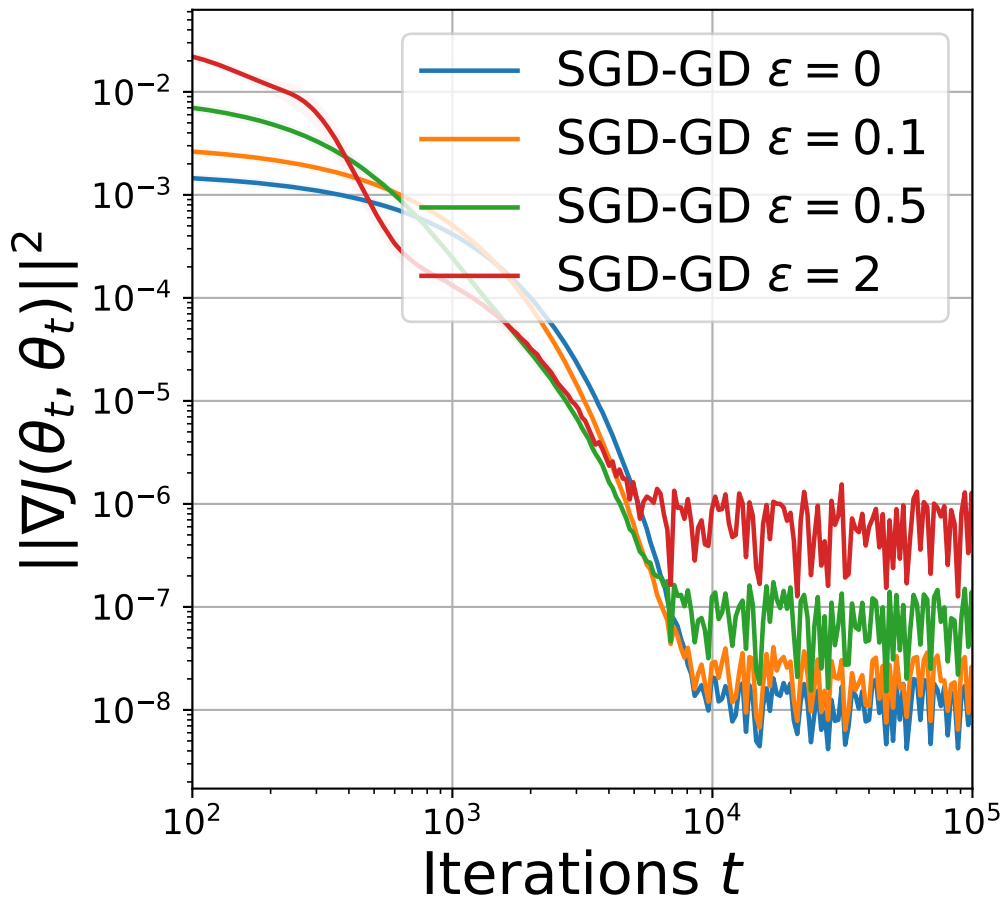

Supplement: supplementary_material [file attachment]

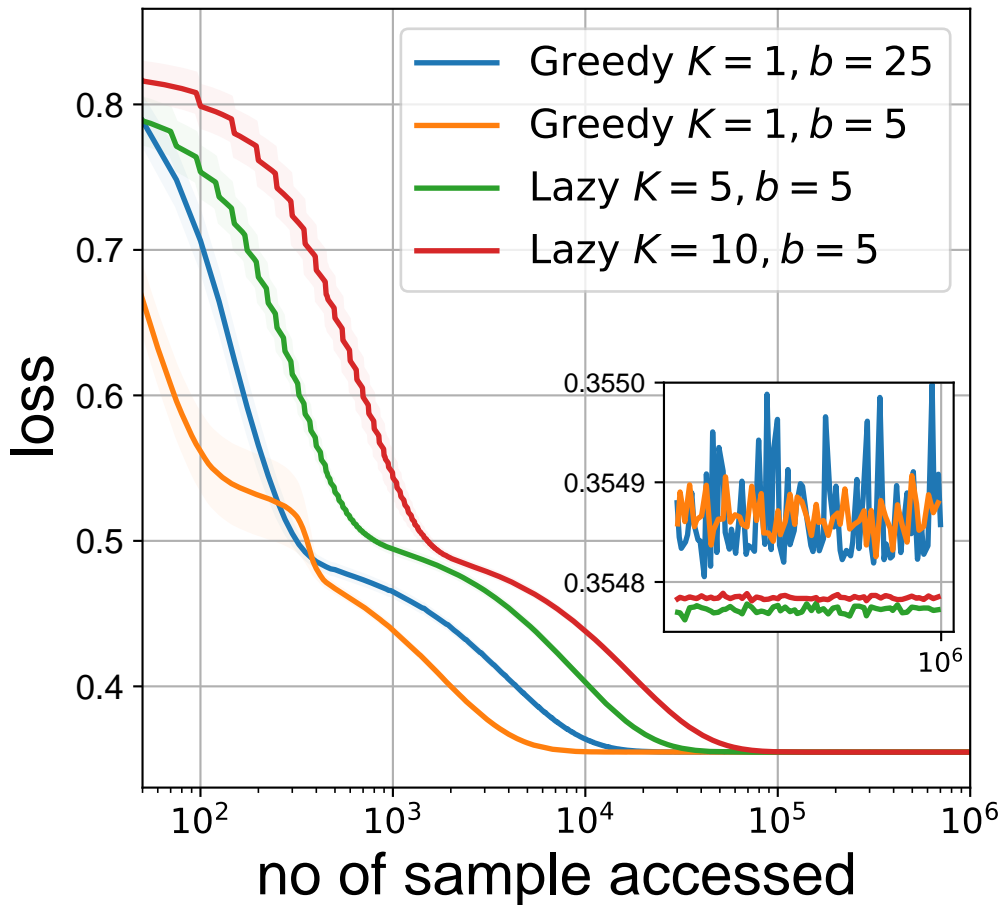

Supplement: supplementary_material [file attachment]

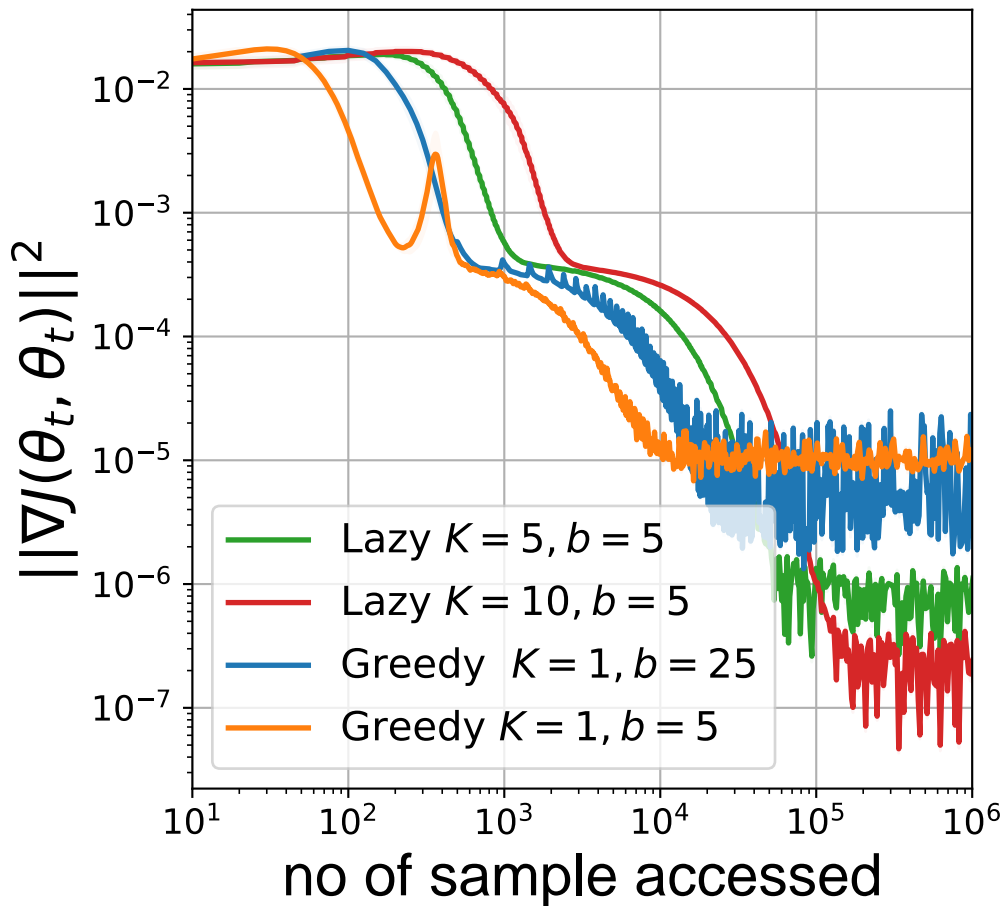

Supplement: supplementary_material [file attachment]

Train Accuracy

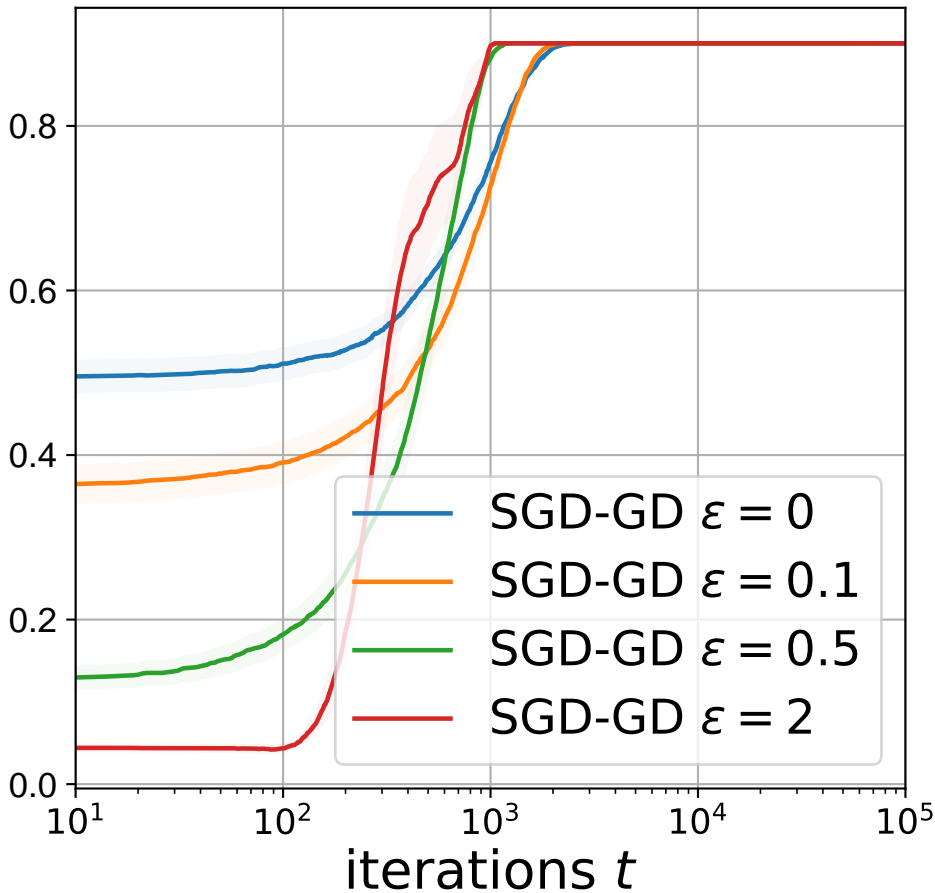

Supplement: supplementary_material [file attachment]

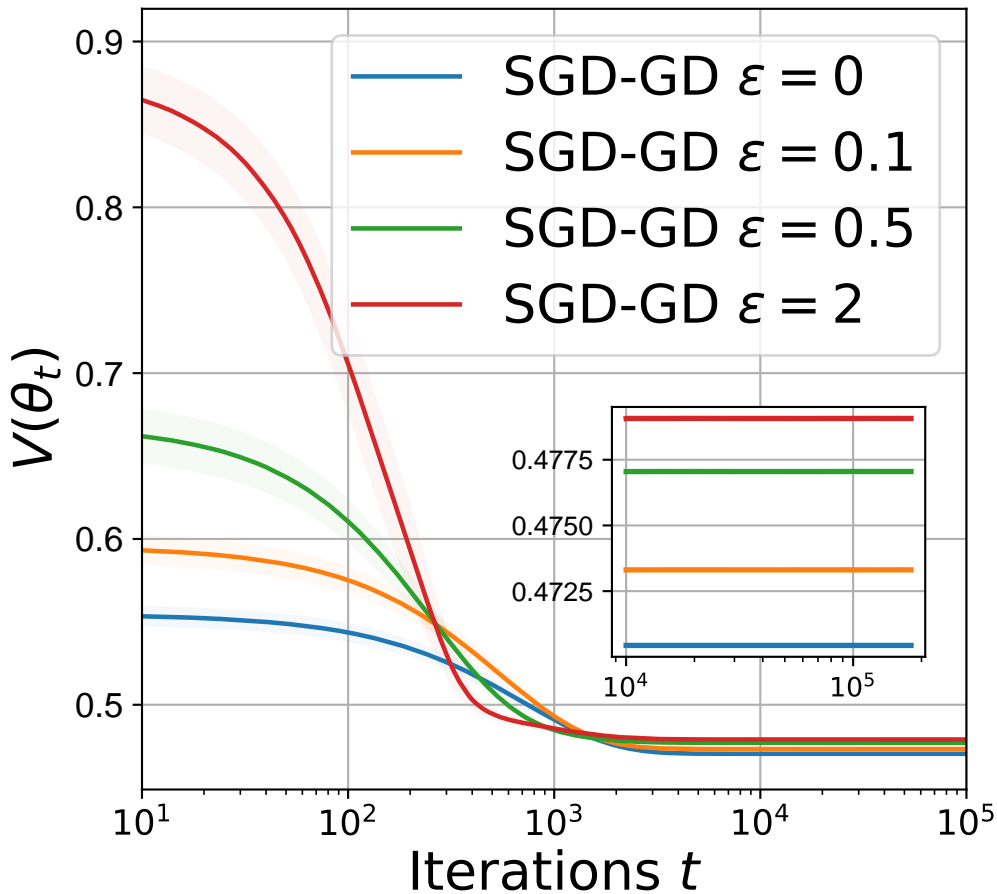

Supplement: supplementary_material [file attachment]

$\varepsilon = 10$

Test Accuracy

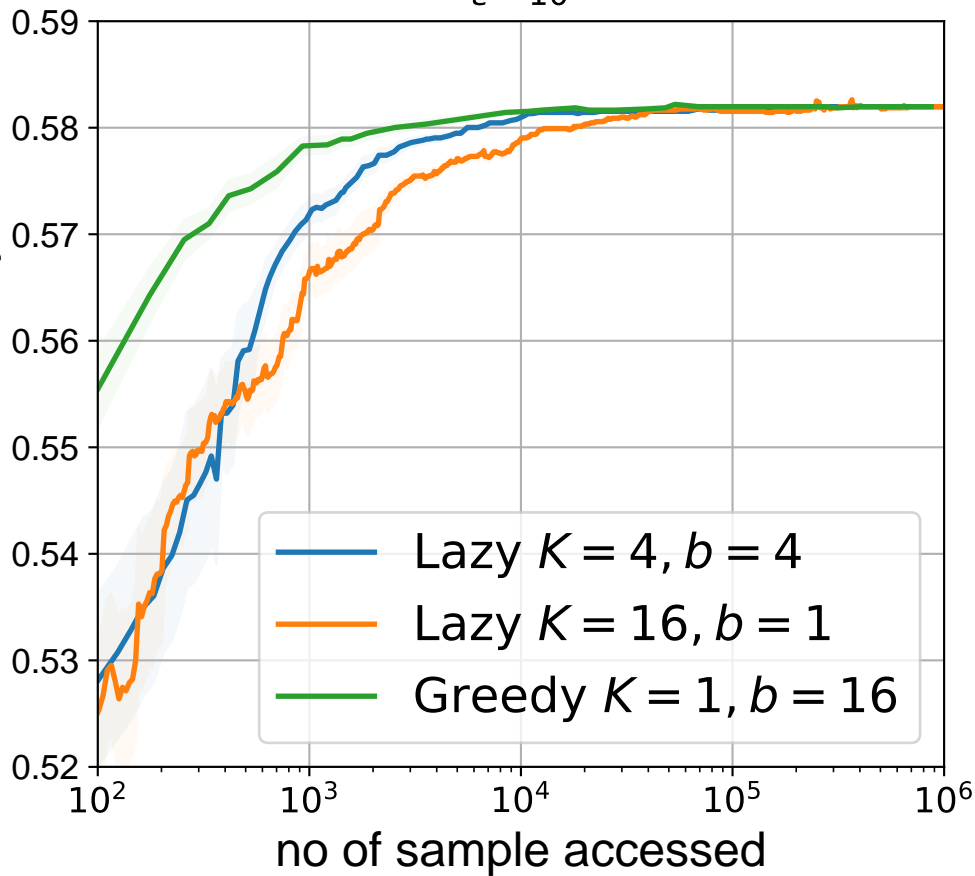

Supplement: supplementary_material [file attachment]
